# Supplementary material for: Dose Optimization of Meropenem in Patients on Veno-Arterial Extracorporeal Membrane Oxygenation in Critically Ill Cardiac Patients: Pharmacokinetic/Pharmacodynamic Modeling
Source: MDPI journal article supplement (doi:10.3390/jcm11226621), 2022-11-08
Supplement: s1 [file s1]

## Supplementary material

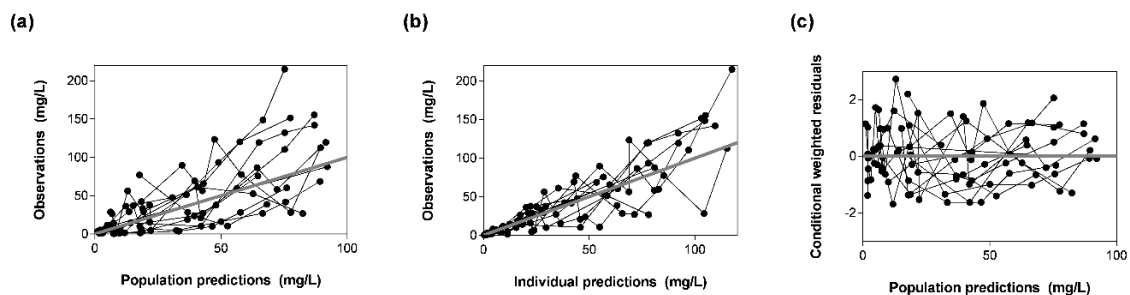

Figure S1. Goodness-of-fit plots of the final population model for meropenem

Observed meropenem concentration versus (a) population predicted concentrations (PRED) and (b) individual predicted concentration (IPRED); (c) conditional weighted residuals (CWRES) versus PRED. Gray solid line represents the line of equality.

Table S1. Probability of target attainment for 10,000 simulated subjects given meropenem

| Administration practice |               | Dose              | PD index | 40% fT>MIC |        |        |        | 100% fT>MIC |        |        |        |      |
|-------------------------|---------------|-------------------|----------|------------|--------|--------|--------|-------------|--------|--------|--------|------|
|                         |               |                   | CRRT     | No         |        | Yes    |        | No          |        | Yes    |        |      |
|                         |               |                   | MIC      | 2 mg/L     | 8 mg/L | 2 mg/L | 8 mg/L | 2 mg/L      | 8 mg/L | 2 mg/L | 8 mg/L |      |
| Every 12 h              | IA            | 1 g               |          | 96.5       | 80.4   | 100    | 99.2   | 41.3        | 11.2   | 90     | 61.9   |      |
|                         |               | 2 g               |          | 98.7       | 91.7   | 100    | 99.8   | 56          | 24.6   | 94.9   | 80.5   |      |
|                         | EI over 3 h   | 0.5 g             |          |            |        |        |        |             |        |        |        |      |
|                         |               | 1 g               |          | 99.7       | 93.6   | 100    | 99.9   | 51          | 15.5   | 93.7   | 70.2   |      |
|                         |               | 2 g               |          | 99.9       | 98.5   | 100    | 100    | 65.8        | 32.8   | 97.1   | 86.2   |      |
|                         | EI over 6 h   | 0.5 g             |          |            |        |        |        |             |        |        |        |      |
|                         |               | 1 g               |          | 100        | 99.8   | 100    | 100    | 66.1        | 24     | 97.4   | 80.2   |      |
|                         |               | 2 g               |          | 100        | 100    | 100    | 100    | 79.6        | 47.1   | 98.9   | 92.9   |      |
|                         | Every 8 h     | IA                | 0.5 g    |            | 98.6   | 81.9   | 100    | 99.4        | 55.6   | 13.6   | 95.2   | 68.1 |
|                         |               |                   | 1 g      |            | 99.6   | 94.9   | 100    | 99.9        | 72.3   | 34.1   | 98.2   | 86.9 |
| 2 g                     |               |                   |          | 99.9       | 98.6   | 100    | 100    | 83.2        | 55.6   | 99.3   | 95.2   |      |
| EI over 3 h             |               | 0.5 g             |          | 100        | 98.2   | 100    | 100    | 70.2        | 21.1   | 98.2   | 77.5   |      |
|                         |               | 1 g               |          | 100        | 99.9   | 100    | 100    | 84          | 47.8   | 99.4   | 93.1   |      |
|                         |               | 2 g               |          | 100        | 100    | 100    | 100    | 91.6        | 70.2   | 99.8   | 98.2   |      |
| EI over 6 h             |               | 0.5 g             |          | 100        | 98.6   | 100    | 100    | 90.2        | 36.6   | 99.7   | 87.6   |      |
|                         |               | 1 g               |          | 100        | 100    | 100    | 100    | 97.1        | 71.7   | 100    | 98.3   |      |
|                         |               | 2 g               |          | 100        | 100    | 100    | 100    | 99.1        | 90.2   | 100    | 99.7   |      |
| CI                      |               | 0.5 g (1.5 g/day) |          | 100        | 97.5   | 100    | 99.9   | 99.1        | 48.6   | 100    | 92.3   |      |
|                         | 1 g (3 g/day) |                   | 100      | 99.9       | 100    | 100    | 100    | 88.8        | 100    | 99.5   |        |      |
|                         | 2 g (6 g/day) |                   | 100      | 100        | 100    | 100    | 100    | 99.1        | 100    | 100    |        |      |

The bold numbers represent PTA above 90%.

PTA, probability of target attainment; CRRT, continuous renal replacement therapy; MIC, minimum inhibitory concentration; IA, intravenous administration over 20 min; EI, extended infusion; CI, continuous infusi
